# Supplementary material for: Adherence to Dietary Recommendations after One Year of Intervention in Breast Cancer Women: The DIANA-5 Trial
Source: MDPI journal article supplement (doi:10.3390/nu13092990), 2021-08-27
Supplement: s1 [file s1]

## EXAMPLES OF DIANA-5 LUNCH

### WINTER MENU

Miso soup with onions  
Brown rice with pumpkins cream and leeks  
Mackerel patè  
Durum wheat bread croutons  
Marinated vegetables with humeboshi vinegar  
Stewed vegetales  
Cereal coffee

### SUMMER MENU

Fresh salad  
Basmati rice with vegetables  
Chickpeas humus  
Marinated vegetables with humeboshi vinegar  
Stewed vegetales  
Fruit kanten

|                 | Winter Menu | Summer Menu | *LARN    |
|-----------------|-------------|-------------|----------|
| Kcal            | 496         | 525         |          |
| Protein         | 16%         | 13%         | 12-18%   |
| Total fat       | 29%         | 28%         | 25-30%   |
| Saturated       | 2%          | 4%          | 10 %     |
| Monounsaturated | 13%         | 2%          |          |
| Polyunsaturated | 5%          | 5%          | 5-10%    |
| Carbohydrate    | 55%         | 59%         | 45-60%   |
| of which sugars | 12%         | 13%         | < 15%    |
| Fiber           | 12.5 g      | 9.0 g       | 30 g     |
| Cholesterol     | 20.8 mg     | 0 mg        | < 300 mg |

\*LARN – about 30% of daily intake of 1870kcal (Levels of reference intake of nutrients and energy for women age 30-74 years )
